# Supplementary material
Source: PubMed Central journal article supplement (PMC3998677)
Supplement: NIHMS569315-supplement-sup_table_1.pdf [file NIHMS569315-supplement-sup_table_1.pdf]

## Supplementary Table 1. Gene sets for OXPHOS, PPAR and podocyte genes in the GSEA

### HSA00190\_OXIDATIVE\_PHOSPHORYLAT Enriched in backcross mice with FVB/FVB genotype on chromosome 8

| NAME   | PROBE    | GENE SYMBOL | GENE_TITLE                                                                                        | RANK IN GENE LIST | RANK METRIC SCORE | RUNNING ES  | CORE ENRICHMENT |
|--------|----------|-------------|---------------------------------------------------------------------------------------------------|-------------------|-------------------|-------------|-----------------|
| row_0  | COX7A1   | COX7A1      | cytochrome c oxidase subunit VIIa polypeptide 1 (muscle)                                          | 263               | 0.146417409       | 0.00594456  | Yes             |
| row_1  | ATP12A   | ATP12A      | ATPase, H+/K+ transporting, nongastric, alpha polypeptide                                         | 284               | 0.14450869        | 0.027140278 | Yes             |
| row_2  | ATP6V1G3 | ATP6V1G3    | ATPase, H+ transporting, lysosomal 13kDa, V1 subunit G3                                           | 330               | 0.139583111       | 0.045970332 | Yes             |
| row_3  | ATP4A    | ATP4A       | ATPase, H+/K+ exchanging, alpha polypeptide                                                       | 380               | 0.134138197       | 0.06369761  | Yes             |
| row_4  | ATP6V0A4 | ATP6V0A4    | ATPase, H+ transporting, lysosomal V0 subunit a4                                                  | 449               | 0.12729311        | 0.07914458  | Yes             |
| row_5  | ATP6V1C2 | ATP6V1C2    | ATPase, H+ transporting, lysosomal 42kDa, V1 subunit C2                                           | 538               | 0.121352933       | 0.092388004 | Yes             |
| row_6  | ATP6V1B1 | ATP6V1B1    | ATPase, H+ transporting, lysosomal 56/58kDa, V1 subunit B1 (Renal tubular acidosis with deafness) | 590               | 0.117458925       | 0.10739319  | Yes             |
| row_7  | COX5A    | COX5A       | cytochrome c oxidase subunit Va                                                                   | 985               | 0.097940154       | 0.097416244 | Yes             |
| row_8  | ATP5I    | ATP5I       | ATP synthase, H+ transporting, mitochondrial F0 complex, subunit E                                | 1045              | 0.095254622       | 0.10845613  | Yes             |
| row_9  | NDUFB10  | NDUFB10     | NADH dehydrogenase (ubiquinone) 1 beta subcomplex, 10, 22kDa                                      | 1175              | 0.090574965       | 0.114289336 | Yes             |
| row_10 | UQCR     | UQCR        | ubiquinol-cytochrome c reductase, 6.4kDa subunit                                                  | 1178              | 0.090515725       | 0.12823926  | Yes             |
| row_11 | COX6B2   | COX6B2      | cytochrome c oxidase subunit VIb polypeptide 2 (testis)                                           | 1187              | 0.090246782       | 0.14176343  | Yes             |
| row_12 | ATP6V1A  | ATP6V1A     | ATPase, H+ transporting, lysosomal 70kDa, V1 subunit A                                            | 1288              | 0.087566487       | 0.14898427  | Yes             |
| row_13 | COX8A    | COX8A       | cytochrome c oxidase subunit 8A (ubiquitous)                                                      | 1308              | 0.087181441       | 0.16132788  | Yes             |
| row_14 | COX6A1   | COX6A1      | cytochrome c oxidase subunit VIa polypeptide 1                                                    | 1339              | 0.086401209       | 0.17284632  | Yes             |
| row_15 | NDUFB8   | NDUFB8      | NADH dehydrogenase (ubiquinone) 1 beta subcomplex, 8, 19kDa                                       | 1443              | 0.083423562       | 0.17923085  | Yes             |
| row_16 | UCRC     | UCRC        | -                                                                                                 | 1468              | 0.082824782       | 0.19057696  | Yes             |
| row_17 | NDUFB2   | NDUFB2      | NADH dehydrogenase (ubiquinone) 1 beta subcomplex, 2, 8kDa                                        | 1508              | 0.081944257       | 0.20082636  | Yes             |
| row_18 | COX6A2   | COX6A2      | cytochrome c oxidase subunit VIa polypeptide 2                                                    | 1558              | 0.080838859       | 0.210264    | Yes             |
| row_19 | NDUFB6   | NDUFB6      | NADH dehydrogenase (ubiquinone) 1 beta subcomplex, 6, 17kDa                                       | 1638              | 0.078940123       | 0.21748683  | Yes             |
| row_20 | ATP6V1C1 | ATP6V1C1    | ATPase, H+ transporting, lysosomal 42kDa, V1 subunit C1                                           | 1774              | 0.075742625       | 0.22062927  | Yes             |
| row_21 | NDUFA2   | NDUFA2      | NADH dehydrogenase (ubiquinone) 1 alpha subcomplex, 2, 8kDa                                       | 1865              | 0.073461987       | 0.22629626  | Yes             |
| row_22 | ATP6V0E1 | ATP6V0E1    | ATPase, H+ transporting, lysosomal 9kDa, V0 subunit e1                                            | 1935              | 0.072087929       | 0.2330932   | Yes             |
| row_23 | ATP6V0C  | ATP6V0C     | ATPase, H+ transporting, lysosomal 16kDa, V0 subunit c                                            | 1936              | 0.072084904       | 0.24430455  | Yes             |
| row_24 | NDUFC2   | NDUFC2      | NADH dehydrogenase (ubiquinone) 1, subcomplex unknown, 2, 14.5kDa                                 | 1969              | 0.071603522       | 0.25339353  | Yes             |
| row_25 | NDUFA1   | NDUFA1      | NADH dehydrogenase (ubiquinone) 1 alpha subcomplex, 1, 7.5kDa                                     | 2012              | 0.070787638       | 0.2617158   | Yes             |
| row_26 | PPA2     | PPA2        | pyrophosphatase (inorganic) 2                                                                     | 2165              | 0.068122745       | 0.2625854   | Yes             |
| row_27 | NDUFA13  | NDUFA13     | NADH dehydrogenase (ubiquinone) 1 alpha subcomplex, 13                                            | 2180              | 0.067848481       | 0.2722421   | Yes             |
| row_28 | ATP6V1G1 | ATP6V1G1    | ATPase, H+ transporting, lysosomal 13kDa, V1 subunit G1                                           | 2199              | 0.06754224        | 0.2815952   | Yes             |
| row_29 | UQCRRS1  | UQCRRS1     | ubiquinol-cytochrome c reductase, Rieske iron-sulfur polypeptide 1                                | 2214              | 0.067259751       | 0.29116032  | Yes             |
| row_30 | ATP5G3   | ATP5G3      | ATP synthase, H+ transporting, mitochondrial F0 complex, subunit C3 (subunit 9)                   | 2360              | 0.065211818       | 0.2920251   | Yes             |
| row_31 | ATP5L    | ATP5L       | ATP synthase, H+ transporting, mitochondrial F0 complex, subunit G                                | 2381              | 0.064975306       | 0.300851    | Yes             |
| row_32 | NDUFS8   | NDUFS8      | NADH dehydrogenase (ubiquinone)                                                                   | 2544              | 0.062724061       | 0.3002411   | Yes             |

| NAME   | PROBE    | GENE SYMBOL | GENE_TITLE                                                                                                     | RANK IN GENE LIST | RANK METRIC SCORE | RUNNING ES | CORE ENRICHMENT |
|--------|----------|-------------|----------------------------------------------------------------------------------------------------------------|-------------------|-------------------|------------|-----------------|
|        |          |             | Fe-S protein 8, 23kDa (NADH-coenzyme Q reductase)                                                              |                   |                   |            |                 |
| row_33 | NDUFA5   | NDUFA5      | NADH dehydrogenase (ubiquinone) 1 alpha subcomplex, 5, 13kDa                                                   | 2648              | 0.061466325       | 0.30321062 | Yes             |
| row_34 | ATP5O    | ATP5O       | ATP synthase, H+ transporting, mitochondrial F1 complex, O subunit (oligomycin sensitivity conferring protein) | 2688              | 0.060708564       | 0.31015724 | Yes             |
| row_35 | COX4I1   | COX4I1      | cytochrome c oxidase subunit IV isoform 1                                                                      | 2745              | 0.059883062       | 0.31588775 | Yes             |
| row_36 | NDUFA3   | NDUFA3      | NADH dehydrogenase (ubiquinone) 1 alpha subcomplex, 3, 9kDa                                                    | 2778              | 0.059420981       | 0.323082   | Yes             |
| row_37 | COX6B1   | COX6B1      | cytochrome c oxidase subunit Vib polypeptide 1 (ubiquitous)                                                    | 2793              | 0.059255853       | 0.33140227 | Yes             |
| row_38 | ATP6V0B  | ATP6V0B     | ATPase, H+ transporting, lysosomal 21kDa, V0 subunit b                                                         | 2798              | 0.05913388        | 0.34034342 | Yes             |
| row_39 | NDUFB3   | NDUFB3      | NADH dehydrogenase (ubiquinone) 1 beta subcomplex, 3, 12kDa                                                    | 2809              | 0.059039596       | 0.34888598 | Yes             |
| row_40 | ATP6V1H  | ATP6V1H     | ATPase, H+ transporting, lysosomal 50/57kDa, V1 subunit H                                                      | 2860              | 0.058267698       | 0.35474917 | Yes             |
| row_41 | COX17    | COX17       | COX17 cytochrome c oxidase assembly homolog (S. cerevisiae)                                                    | 2947              | 0.057131935       | 0.3581323  | Yes             |
| row_42 | NDUFAB1  | NDUFAB1     | NADH dehydrogenase (ubiquinone) 1, alpha/beta subcomplex, 1, 8kDa                                              | 2980              | 0.056749132       | 0.364911   | Yes             |
| row_43 | NDUFS7   | NDUFS7      | NADH dehydrogenase (ubiquinone) Fe-S protein 7, 20kDa (NADH-coenzyme Q reductase)                              | 3094              | 0.055093866       | 0.36624956 | Yes             |
| row_44 | COX7A2   | COX7A2      | cytochrome c oxidase subunit VIIa polypeptide 2 (liver)                                                        | 3100              | 0.055025637       | 0.37448776 | Yes             |
| row_45 | NDUFB7   | NDUFB7      | NADH dehydrogenase (ubiquinone) 1 beta subcomplex, 7, 18kDa                                                    | 3106              | 0.054933064       | 0.3827116  | Yes             |
| row_46 | SDHD     | SDHD        | succinate dehydrogenase complex, subunit D, integral membrane protein                                          | 3114              | 0.054735865       | 0.39077675 | Yes             |
| row_47 | COX6C    | COX6C       | cytochrome c oxidase subunit VIc succinate dehydrogenase complex, subunit B, iron sulfur (lp)                  | 3135              | 0.054513697       | 0.39797556 | Yes             |
| row_48 | SDHB     | SDHB        | succinate dehydrogenase complex, subunit B, iron sulfur (lp)                                                   | 3169              | 0.054155197       | 0.40428686 | Yes             |
| row_49 | NDUFA9   | NDUFA9      | NADH dehydrogenase (ubiquinone) 1 alpha subcomplex, 9, 39kDa                                                   | 3223              | 0.053435154       | 0.40920648 | Yes             |
| row_50 | ATP5J2   | ATP5J2      | ATP synthase, H+ transporting, mitochondrial F0 complex, subunit F2                                            | 3320              | 0.052301317       | 0.41119844 | Yes             |
| row_51 | ATP5G1   | ATP5G1      | ATP synthase, H+ transporting, mitochondrial F0 complex, subunit C1 (subunit 9)                                | 3358              | 0.05187875        | 0.41689974 | Yes             |
| row_52 | ATP6V1D  | ATP6V1D     | ATPase, H+ transporting, lysosomal 34kDa, V1 subunit D                                                         | 3392              | 0.051405035       | 0.4227833  | Yes             |
| row_53 | NDUFA11  | NDUFA11     | NADH dehydrogenase (ubiquinone) 1 alpha subcomplex, 11, 14.7kDa                                                | 3398              | 0.051321279       | 0.43044534 | Yes             |
| row_54 | ATP5G2   | ATP5G2      | ATP synthase, H+ transporting, mitochondrial F0 complex, subunit C2 (subunit 9)                                | 3414              | 0.051111236       | 0.4374349  | Yes             |
| row_55 | NDUFB11  | NDUFB11     | NADH dehydrogenase (ubiquinone) 1 beta subcomplex, 11, 17.3kDa                                                 | 3482              | 0.050515436       | 0.44100466 | Yes             |
| row_56 | NDUFB5   | NDUFB5      | NADH dehydrogenase (ubiquinone) 1 beta subcomplex, 5, 16kDa                                                    | 3495              | 0.050409045       | 0.44807696 | Yes             |
| row_57 | ATP6V1F  | ATP6V1F     | ATPase, H+ transporting, lysosomal 14kDa, V1 subunit F                                                         | 3530              | 0.050050516       | 0.45368585 | Yes             |
| row_58 | COX10    | COX10       | COX10 homolog, cytochrome c oxidase assembly protein, heme A: farnesyltransferase (yeast)                      | 3653              | 0.048669662       | 0.45344943 | Yes             |
| row_59 | NDUFC1   | NDUFC1      | NADH dehydrogenase (ubiquinone) 1, subcomplex unknown, 1, 6kDa                                                 | 3655              | 0.048664346       | 0.4609542  | Yes             |
| row_60 | NDUFB9   | NDUFB9      | NADH dehydrogenase (ubiquinone) 1 beta subcomplex, 9, 22kDa                                                    | 3657              | 0.048647691       | 0.4684564  | Yes             |
| row_61 | NDUFS6   | NDUFS6      | NADH dehydrogenase (ubiquinone) Fe-S protein 6, 13kDa (NADH-coenzyme Q reductase)                              | 3826              | 0.046677671       | 0.4649669  | Yes             |
| row_62 | ATP6V1E1 | ATP6V1E1    | ATPase, H+ transporting, lysosomal 31kDa, V1 subunit E1                                                        | 3863              | 0.046266485       | 0.4698593  | Yes             |
| row_63 | ATP5D    | ATP5D       | ATP synthase, H+ transporting, mitochondrial F1 complex, delta subunit                                         | 3934              | 0.045618113       | 0.4724754  | Yes             |
| row_64 | ATP6V1B2 | ATP6V1B2    | ATPase, H+ transporting, lysosomal 56/58kDa, V1 subunit B2                                                     | 4001              | 0.045052744       | 0.47525954 | Yes             |

| NAME   | PROBE    | GENE SYMBOL | GENE_TITLE                                                                               | RANK IN GENE LIST | RANK METRIC SCORE | RUNNING ES | CORE ENRICHMENT |
|--------|----------|-------------|------------------------------------------------------------------------------------------|-------------------|-------------------|------------|-----------------|
| row_65 | UQCRQ    | UQCRQ       | ubiquinol-cytochrome c reductase, complex III subunit VII, 9.5kDa                        | 4049              | 0.044544566       | 0.4791803  | Yes             |
| row_66 | ATP5F1   | ATP5F1      | ATP synthase, H+ transporting, mitochondrial F0 complex, subunit B1                      | 4114              | 0.043945294       | 0.48192015 | Yes             |
| row_67 | COX7C    | COX7C       | cytochrome c oxidase subunit VIIc                                                        | 4174              | 0.043163523       | 0.48485833 | Yes             |
| row_68 | CYC1     | CYC1        | cytochrome c-1                                                                           | 4195              | 0.042933811       | 0.49025613 | Yes             |
| row_69 | NDUFV3   | NDUFV3      | NADH dehydrogenase (ubiquinone) flavoprotein 3, 10kDa                                    | 4318              | 0.041829336       | 0.48895583 | Yes             |
| row_70 | COX15    | COX15       | COX15 homolog, cytochrome c oxidase assembly protein (yeast)                             | 4379              | 0.041227683       | 0.49152896 | Yes             |
| row_71 | NDUFS2   | NDUFS2      | NADH dehydrogenase (ubiquinone) Fe-S protein 2, 49kDa (NADH-coenzyme Q reductase)        | 4519              | 0.040029161       | 0.48886093 | No              |
| row_72 | NDUFS3   | NDUFS3      | NADH dehydrogenase (ubiquinone) Fe-S protein 3, 30kDa (NADH-coenzyme Q reductase)        | 4883              | 0.036457434       | 0.4713051  | No              |
| row_73 | ATP6V0D1 | ATP6V0D1    | ATPase, H+ transporting, lysosomal 38kDa, V0 subunit d1                                  | 4896              | 0.036312252       | 0.47618493 | No              |
| row_74 | UQCRC1   | UQCRC1      | ubiquinol-cytochrome c reductase core protein I                                          | 5073              | 0.034766909       | 0.4703311  | No              |
| row_75 | ATP5B    | ATP5B       | ATP synthase, H+ transporting, mitochondrial F1 complex, beta polypeptide                | 5088              | 0.034618415       | 0.4748195  | No              |
| row_76 | NDUFV1   | NDUFV1      | NADH dehydrogenase (ubiquinone) flavoprotein 1, 51kDa                                    | 5105              | 0.034508523       | 0.47916287 | No              |
| row_77 | ATP6AP1  | ATP6AP1     | ATPase, H+ transporting, lysosomal accessory protein 1                                   | 5220              | 0.033605803       | 0.47709545 | No              |
| row_78 | COX7B    | COX7B       | cytochrome c oxidase subunit VIIb                                                        | 5485              | 0.031109437       | 0.4650422  | No              |
| row_79 | NDUFA6   | NDUFA6      | NADH dehydrogenase (ubiquinone) 1 alpha subcomplex, 6, 14kDa                             | 5504              | 0.031013148       | 0.46871397 | No              |
| row_80 | NDUFA7   | NDUFA7      | NADH dehydrogenase (ubiquinone) 1 alpha subcomplex, 7, 14.5kDa                           | 5626              | 0.029982839       | 0.46563518 | No              |
| row_81 | UQCRC2   | UQCRC2      | ubiquinol-cytochrome c reductase core protein II                                         | 5746              | 0.029003846       | 0.46253207 | No              |
| row_82 | ATP5A1   | ATP5A1      | ATP synthase, H+ transporting, mitochondrial F1 complex, alpha subunit 1, cardiac muscle | 5756              | 0.028952152       | 0.46645916 | No              |
| row_83 | NDUFS5   | NDUFS5      | NADH dehydrogenase (ubiquinone) Fe-S protein 5, 15kDa (NADH-coenzyme Q reductase)        | 5797              | 0.028591825       | 0.4683467  | No              |
| row_84 | COX5B    | COX5B       | cytochrome c oxidase subunit Vb                                                          | 5828              | 0.028301094       | 0.47082883 | No              |
| row_85 | ATP5J    | ATP5J       | ATP synthase, H+ transporting, mitochondrial F0 complex, subunit F6                      | 6040              | 0.026580039       | 0.4614623  | No              |
| row_86 | NDUFS1   | NDUFS1      | NADH dehydrogenase (ubiquinone) Fe-S protein 1, 75kDa (NADH-coenzyme Q reductase)        | 6068              | 0.0263699         | 0.463836   | No              |
| row_87 | NDUFA4   | NDUFA4      | NADH dehydrogenase (ubiquinone) 1 alpha subcomplex, 4, 9kDa                              | 6077              | 0.026281144       | 0.46741164 | No              |
| row_88 | COX4I2   | COX4I2      | cytochrome c oxidase subunit IV isoform 2 (lung)                                         | 6258              | 0.024969779       | 0.45977813 | No              |
| row_89 | SDHC     | SDHC        | succinate dehydrogenase complex, subunit C, integral membrane protein, 15kDa             | 6384              | 0.023978684       | 0.45550957 | No              |
| row_90 | ATP5C1   | ATP5C1      | ATP synthase, H+ transporting, mitochondrial F1 complex, gamma polypeptide 1             | 6472              | 0.023214167       | 0.4535535  | No              |
| row_91 | SDHA     | SDHA        | succinate dehydrogenase complex, subunit A, flavoprotein (Fp)                            | 6557              | 0.022620434       | 0.45169702 | No              |
| row_92 | NDUFA8   | NDUFA8      | NADH dehydrogenase (ubiquinone) 1 alpha subcomplex, 8, 19kDa                             | 6776              | 0.020870605       | 0.4409946  | No              |
| row_93 | ATP6V0D2 | ATP6V0D2    | ATPase, H+ transporting, lysosomal 38kDa, V0 subunit d2                                  | 6862              | 0.020299235       | 0.43871313 | No              |
| row_94 | ATP6V0A2 | ATP6V0A2    | ATPase, H+ transporting, lysosomal V0 subunit a2                                         | 6882              | 0.020076033       | 0.44061986 | No              |
| row_95 | NDUFS4   | NDUFS4      | NADH dehydrogenase (ubiquinone) Fe-S protein 4, 18kDa (NADH-coenzyme Q reductase)        | 6916              | 0.01980632        | 0.44158888 | No              |
| row_96 | NDUFV2   | NDUFV2      | NADH dehydrogenase (ubiquinone) flavoprotein 2, 24kDa                                    | 6932              | 0.019679364       | 0.44368982 | No              |
| row_97 | ATP4B    | ATP4B       | ATPase, H+/K+ exchanging, beta polypeptide                                               | 6992              | 0.019276714       | 0.4429129  | No              |
| row_98 | NDUFA10  | NDUFA10     | NADH dehydrogenase (ubiquinone) 1                                                        | 7088              | 0.01862363        | 0.43973097 | No              |

| NAME    | PROBE    | GENE SYMBOL | GENE_TITLE                                                                   | RANK IN GENE LIST | RANK METRIC SCORE | RUNNING ES  | CORE ENRICHMENT |
|---------|----------|-------------|------------------------------------------------------------------------------|-------------------|-------------------|-------------|-----------------|
|         |          |             | alpha subcomplex, 10, 42kDa                                                  |                   |                   |             |                 |
| row_99  | ATP6V1G2 | ATP6V1G2    | ATPase, H+ transporting, lysosomal 13kDa, V1 subunit G2                      | 7178              | 0.017916573       | 0.436823    | No              |
| row_100 | UQCRB    | UQCRB       | ubiquinol-cytochrome c reductase binding protein                             | 7418              | 0.016037006       | 0.42402515  | No              |
| row_101 | NDUFA12  | NDUFA12     | NADH dehydrogenase (ubiquinone) 1 alpha subcomplex, 12                       | 7914              | 0.012351546       | 0.3942743   | No              |
| row_102 | ATP6V1E2 | ATP6V1E2    | ATPase, H+ transporting, lysosomal 31kDa, V1 subunit E2                      | 7930              | 0.012237792       | 0.39521787  | No              |
| row_103 | ND1      | ND1         | mitochondrially encoded NADH dehydrogenase 1                                 | 8584              | 0.007557465       | 0.35461196  | No              |
| row_104 | CYTB     | CYTB        | mitochondrially encoded cytochrome b                                         | 9138              | 0.003745858       | 0.3198116   | No              |
| row_105 | ND3      | ND3         | mitochondrially encoded NADH dehydrogenase 3                                 | 9219              | 0.003203547       | 0.31519118  | No              |
| row_106 | ATP6     | ATP6        | mitochondrially encoded ATP synthase 6                                       | 9233              | 0.003114851       | 0.31484386  | No              |
| row_107 | ND5      | ND5         | mitochondrially encoded NADH dehydrogenase 5                                 | 9280              | 0.002705407       | 0.31232136  | No              |
| row_108 | COX2     | COX2        | mitochondrially encoded cytochrome c oxidase II                              | 9394              | 0.001940248       | 0.30539298  | No              |
| row_109 | COX1     | COX1        | mitochondrially encoded cytochrome c oxidase I                               | 9797              | 0.001130274       | 0.27984735  | No              |
| row_110 | ND4L     | ND4L        | mitochondrially encoded NADH 4L                                              | 11005             | 0.011678575       | 0.2044355   | No              |
| row_111 | ATP6V0A1 | ATP6V0A1    | ATPase, H+ transporting, lysosomal V0 subunit a1                             | 11309             | 0.014455482       | 0.18729672  | No              |
| row_112 | NDUFA4L2 | NDUFA4L2    | NADH dehydrogenase (ubiquinone) 1 alpha subcomplex, 4-like 2                 | 12097             | 0.023736797       | 0.14063339  | No              |
| row_113 | TCIRG1   | TCIRG1      | T-cell, immune regulator 1, ATPase, H+ transporting, lysosomal V0 subunit A3 | 14523             | 0.092372634       | -1.60E-04   | No              |
| row_114 | PPA1     | PPA1        | pyrophosphatase (inorganic) 1                                                | 15145             | 0.176813647       | -0.01239427 | No              |
| row_115 | LHPP     | LHPP        | -                                                                            | 15466             | 0.325703025       | 0.017787462 | No              |

**HSA03320\_PPAR\_SIGNALING\_PATHWAY Enriched in backcross mice with FVB/B6 genotype on chromosome 8**

| NAME   | PROBE   | GENE SYMBOL | GENE_TITLE                                                                            | RANK IN GENE LIST | RANK METRIC SCORE | RUNNING ES   | CORE ENRICHMENT |
|--------|---------|-------------|---------------------------------------------------------------------------------------|-------------------|-------------------|--------------|-----------------|
| row_0  | FABP3   | FABP3       | fatty acid binding protein 3, muscle and heart (mammary-derived growth inhibitor)     | 184               | 0.156955391       | 0.006339061  | No              |
| row_1  | FABP7   | FABP7       | fatty acid binding protein 7, brain                                                   | 260               | 0.146765053       | 0.018457001  | No              |
| row_2  | AQP7    | AQP7        | aquaporin 7                                                                           | 356               | 0.137024879       | 0.028177576  | No              |
| row_3  | ACOX3   | ACOX3       | acyl-Coenzyme A oxidase 3, pristanoyl                                                 | 1518              | 0.081703998       | -0.03646607  | No              |
| row_4  | GK      | GK          | glycerol kinase                                                                       | 2060              | 0.069891594       | -0.062924184 | No              |
| row_5  | CPT1B   | CPT1B       | carnitine palmitoyltransferase 1B (muscle)                                            | 2117              | 0.068694092       | -0.05858514  | No              |
| row_6  | FABP6   | FABP6       | fatty acid binding protein 6, ileal (gastrotopin)                                     | 3582              | 0.049399152       | -0.14627552  | No              |
| row_7  | ACSL6   | ACSL6       | acyl-CoA synthetase long-chain family member 6                                        | 4096              | 0.044154759       | -0.17391159  | No              |
| row_8  | RXRβ    | RXRβ        | retinoid X receptor, beta                                                             | 4580              | 0.039380409       | -0.20018397  | No              |
| row_9  | CPT1C   | CPT1C       | carnitine palmitoyltransferase 1C                                                     | 5186              | 0.033813104       | -0.2348791   | No              |
| row_10 | DBI     | DBI         | diazepam binding inhibitor (GABA receptor modulator, acyl-Coenzyme A binding protein) | 5779              | 0.028722875       | -0.26933125  | No              |
| row_11 | MMP1    | MMP1        | matrix metalloproteinase 1 (interstitial collagenase)                                 | 6171              | 0.025530715       | -0.2913305   | No              |
| row_12 | UCP1    | UCP1        | uncoupling protein 1 (mitochondrial, proton carrier)                                  | 6657              | 0.021833958       | -0.31975114  | No              |
| row_13 | PDK1    | PDK1        | 3-phosphoinositide dependent protein kinase-1                                         | 7400              | 0.016148843       | -0.36521888  | No              |
| row_14 | CPT2    | CPT2        | carnitine palmitoyltransferase II                                                     | 7810              | 0.013249605       | -0.38978052  | No              |
| row_15 | GK2     | GK2         | glycerol kinase 2                                                                     | 7901              | 0.012510447       | -0.39408034  | No              |
| row_16 | SLC27A2 | SLC27A2     | solute carrier family 27 (fatty acid transporter), member 2                           | 7924              | 0.012266201       | -0.39407098  | No              |
| row_17 | ILK     | ILK         | integrin-linked kinase                                                                | 8025              | 0.01165052        | -0.39910766  | No              |
| row_18 | ME1     | ME1         | malic enzyme 1, NADP(+)-dependent, cytosolic                                          | 8169              | 0.010475153       | -0.4070224   | No              |
| row_19 | ACADL   | ACADL       | acyl-Coenzyme A dehydrogenase, long chain                                             | 8260              | 0.00986198        | -0.41162717  | No              |
| row_20 | CD36    | CD36        | CD36 molecule (thrombospondin receptor)                                               | 8523              | 0.007935122       | -0.42742467  | No              |
| row_21 | UBC     | UBC         | ubiquitin C                                                                           | 8530              | 0.007886427       | -0.42689916  | No              |
| row_22 | ACADM   | ACADM       | acyl-Coenzyme A dehydrogenase, C-4 to C-12 straight chain                             | 8796              | 0.006091108       | -0.44310036  | No              |
| row_23 | SLC27A6 | SLC27A6     | solute carrier family 27 (fatty acid transporter), member 6                           | 9049              | 0.004355448       | -0.45867226  | No              |
| row_24 | EHHADH  | EHHADH      | enoyl-Coenzyme A, hydratase/3-hydroxyacyl Coenzyme A dehydrogenase                    | 9172              | 0.003494015       | -0.4660515   | No              |
| row_25 | SORBS1  | SORBS1      | sorbin and SH3 domain containing 1                                                    | 9179              | 0.003430893       | -0.4660391   | No              |
| row_26 | PPARδ   | PPARδ       | peroxisome proliferative activated receptor, delta                                    | 9272              | 0.002763955       | -0.47158888  | No              |
| row_27 | CPT1A   | CPT1A       | carnitine palmitoyltransferase 1A (liver)                                             | 9601              | 4.44E-04          | -0.49245882  | No              |
| row_28 | ACSL4   | ACSL4       | acyl-CoA synthetase long-chain family member 4                                        | 9715              | -5.65E-04         | -0.4996013   | No              |
| row_29 | OLR1    | OLR1        | oxidised low density lipoprotein (lectin-like) receptor 1                             | 9982              | 0.002729255       | -0.5162535   | No              |
| row_30 | SLC27A4 | SLC27A4     | solute carrier family 27 (fatty acid transporter), member 4                           | 10457             | 0.006595494       | -0.5457274   | No              |
| row_31 | PCK2    | PCK2        | phosphoenolpyruvate carboxykinase 2 (mitochondrial)                                   | 11012             | 0.011719294       | -0.5797139   | No              |
| row_32 | SLC27A1 | SLC27A1     | solute carrier family 27 (fatty acid transporter), member 1                           | 11536             | 0.016875587       | -0.6111293   | No              |
| row_33 | PCK1    | PCK1        | phosphoenolpyruvate carboxykinase 1 (soluble)                                         | 11849             | 0.020470466       | -0.6286724   | No              |
| row_34 | ACSL3   | ACSL3       | acyl-CoA synthetase long-chain family member 3                                        | 12156             | 0.024375826       | -0.645383    | No              |
| row_35 | LPL     | LPL         | lipoprotein lipase                                                                    | 12163             | -                 | -0.64294946  | No              |

| NAME   | PROBE   | GENE SYMBOL | GENE_TITLE                                                                      | RANK IN GENE LIST | RANK METRIC SCORE | RUNNING ES  | CORE ENRICHMENT |
|--------|---------|-------------|---------------------------------------------------------------------------------|-------------------|-------------------|-------------|-----------------|
|        |         |             |                                                                                 |                   | 0.024454838       |             |                 |
| row_36 | CYP4A11 | CYP4A11     | cytochrome P450, family 4, subfamily A, polypeptide 11                          | 12164             | -0.02445963       | -0.64013267 | No              |
| row_37 | ACOX1   | ACOX1       | acyl-Coenzyme A oxidase 1, palmitoyl                                            | 12298             | 0.026169602       | -0.64560217 | No              |
| row_38 | FADS2   | FADS2       | fatty acid desaturase 2                                                         | 12917             | 0.036361918       | -0.6808329  | No              |
| row_39 | CYP4A22 | CYP4A22     | cytochrome P450, family 4, subfamily A, polypeptide 22                          | 13336             | 0.044825472       | -0.7023323  | No              |
| row_40 | RXRG    | RXRG        | retinoid X receptor, gamma                                                      | 13398             | 0.046121597       | -0.7009117  | No              |
| row_41 | ACAA1   | ACAA1       | acetyl-Coenzyme A acyltransferase 1 (peroxisomal 3-oxoacyl-Coenzyme A thiolase) | 13620             | 0.051785085       | -0.7090442  | No              |
| row_42 | FABP4   | FABP4       | fatty acid binding protein 4, adipocyte                                         | 13981             | 0.063642614       | -0.72467715 | Yes             |
| row_43 | PLIN    | PLIN        | perilipin                                                                       | 14061             | 0.066581093       | -0.72204846 | Yes             |
| row_44 | ACOX2   | ACOX2       | acyl-Coenzyme A oxidase 2, branched chain                                       | 14063             | 0.066680446       | -0.7144332  | Yes             |
| row_45 | NR1H3   | NR1H3       | nuclear receptor subfamily 1, group H, member 3                                 | 14233             | 0.074696057       | -0.7166105  | Yes             |
| row_46 | ADIPOQ  | ADIPOQ      | adiponectin, C1Q and collagen domain containing                                 | 14247             | 0.075301267       | -0.7087679  | Yes             |
| row_47 | ACSL1   | ACSL1       | acyl-CoA synthetase long-chain family member 1                                  | 14355             | 0.081421435       | -0.7062161  | Yes             |
| row_48 | CYP27A1 | CYP27A1     | cytochrome P450, family 27, subfamily A, polypeptide 1                          | 14441             | 0.086327061       | -0.7016961  | Yes             |
| row_49 | RXRA    | RXRA        | retinoid X receptor, alpha                                                      | 14477             | 0.088543884       | -0.69373167 | Yes             |
| row_50 | ACSL5   | ACSL5       | acyl-CoA synthetase long-chain family member 5                                  | 14782             | 0.117919549       | -0.6995421  | Yes             |
| row_51 | PPARA   | PPARA       | peroxisome proliferative activated receptor, alpha                              | 14812             | 0.122051336       | -0.6873362  | Yes             |
| row_52 | PLTP    | PLTP        | phospholipid transfer protein                                                   | 14971             | -0.14311789       | -0.6809323  | Yes             |
| row_53 | ANGPTL4 | ANGPTL4     | angiopoietin-like 4                                                             | 15070             | 0.158049285       | -0.66898185 | Yes             |
| row_54 | SCP2    | SCP2        | sterol carrier protein 2                                                        | 15095             | 0.162264138       | -0.6518261  | Yes             |
| row_55 | PPARG   | PPARG       | peroxisome proliferative activated receptor, gamma                              | 15258             | 0.207940832       | -0.6382122  | Yes             |
| row_56 | HMGCS2  | HMGCS2      | 3-hydroxy-3-methylglutaryl-Coenzyme A synthase 2 (mitochondrial)                | 15421             | 0.289545238       | -0.61520064 | Yes             |
| row_57 | SCD     | SCD         | stearoyl-CoA desaturase (delta-9-desaturase)                                    | 15560             | 0.418036878       | -0.5758609  | Yes             |
| row_58 | CYP8B1  | CYP8B1      | cytochrome P450, family 8, subfamily B, polypeptide 1                           | 15576             | 0.433613658       | -0.526882   | Yes             |
| row_59 | APOA5   | APOA5       | apolipoprotein A-V                                                              | 15603             | 0.468184412       | -0.47462344 | Yes             |
| row_60 | FABP2   | FABP2       | fatty acid binding protein 2, intestinal                                        | 15616             | 0.482269734       | -0.4198498  | Yes             |
| row_61 | APOC3   | APOC3       | apolipoprotein C-III                                                            | 15631             | 0.499563843       | -0.36321217 | Yes             |
| row_62 | CYP7A1  | CYP7A1      | cytochrome P450, family 7, subfamily A, polypeptide 1                           | 15676             | 0.565514505       | -0.300893   | Yes             |
| row_63 | APOA2   | APOA2       | apolipoprotein A-II                                                             | 15682             | 0.569992483       | -0.23557062 | Yes             |
| row_64 | SLC27A5 | SLC27A5     | solute carrier family 27 (fatty acid transporter), member 5                     | 15690             | -0.5886603        | -0.16822597 | Yes             |
| row_65 | APOA1   | APOA1       | apolipoprotein A-I                                                              | 15724             | 0.695596039       | -0.0902248  | Yes             |
| row_66 | FABP1   | FABP1       | fatty acid binding protein 1, liver                                             | 15741             | 0.793983042       | 1.91E-04    | Yes             |

## Hand curated gene set of podocyte expressed genes

| Symbol        | Description                                                                         | Location            |
|---------------|-------------------------------------------------------------------------------------|---------------------|
| Col4a4        | collagen, type IV, alpha 4                                                          | 1 C5                |
| Usp40         | ubiquitin specific peptidase 40                                                     | 1 D                 |
| Itgb5         | integrin beta 5                                                                     | 16 B3               |
| Scyl3         | SCY1-like 3 ( <i>S. cerevisiae</i> )                                                | 1 H2.2              |
| Tcf21         | transcription factor 21                                                             | 10 A3 10 16.0 cM    |
| Wt1           | Wilms tumor homolog                                                                 | 2 E 2 58.0 cM       |
| Timp3         | tissue inhibitor of metalloproteinase 3                                             | 10 C1-D1 10 47.0 cM |
| Adcy1         | adenylate cyclase 1                                                                 | 11 A2               |
| Podnl1        | podocan-like 1                                                                      | 8 C3                |
| Mapt          | microtubule-associated protein tau                                                  | 11 E1 11 64.0 cM    |
| Sdk2          | sidekick homolog 2 (chicken)                                                        | 11 E2               |
| C1qtnf1       | C1q and tumor necrosis factor related protein 1                                     | 11 E2               |
| 2310051M13Rik | RIKEN cDNA 2310051M13 gene                                                          | 13 B2               |
| Synpo2l       | synaptopodin 2-like                                                                 | 14 A3               |
| Podxl2        | podocalyxin-like 2                                                                  | 6 D1                |
| Bmp4          | bone morphogenetic protein 4                                                        | 14 C1 14 15.0 cM    |
| Galnt10       | UDP-N-acetyl-alpha-D-galactosamine:polypeptide N-acetylgalactosaminyltransferase 10 | 11 B1.3             |
| Fyb           | FYN binding protein                                                                 | 15 A1               |
| Clic3         | chloride intracellular channel 3                                                    | 2 A3                |
| Myh9          | myosin, heavy polypeptide 9, non-muscle                                             | 15 E1 15 43.3 cM    |
| Rtn4r         | reticulon 4 receptor                                                                | ---                 |
| Arvcf         | armadillo repeat gene deleted in velo-cardio-facial syndrome                        | 16 A3 16 11.18 cM   |
| Rab3b         | RAB3B, member RAS oncogene family                                                   | 4 C7                |
| Plat          | plasminogen activator, tissue                                                       | 8 A2 8 9.0 cM       |
| Cd2ap         | CD2-associated protein                                                              | 17 B3               |
| Vegfa         | vascular endothelial growth factor A                                                | 17 C 17 24.2 cM     |
| Ehd3          | EH-domain containing 3                                                              | 17 43.25 cM         |
| Plekhh2       | pleckstrin homology domain containing, family H (with MyTH4 domain) member 2        | 17 E4               |
| Sncaip        | synuclein, alpha interacting protein (synphilin)                                    | 18 D1               |
| Synpo         | synaptopodin                                                                        | 18 D3               |
| Plce1         | phospholipase C, epsilon 1                                                          | 19 D1               |
| Vim           | vimentin                                                                            | 2 A2 2 7.0 cM       |
| Nrp1          | neuropilin 1                                                                        | 8 E 8 73.0 cM       |
| Ralgps1       | Ral GEF with PH domain and SH3 binding motif 1                                      | 2 B                 |
| Angptl2       | angiopoietin-like 2                                                                 | 2 B                 |
| Lmx1b         | LIM homeobox transcription factor 1 beta                                            | 2 B 2 21.0 cM       |
| Lrp2          | low density lipoprotein receptor-related protein 2                                  | 2 C2 2 40.0 cM      |
| Cd59a         | CD59a antigen                                                                       | 2 55.0 cM           |
| Nrp1          | neuropilin 1                                                                        | 8 E 8 73.0 cM       |
| Ptpro         | protein tyrosine phosphatase, receptor type, O                                      | 6 G1                |
| Trpc3         | transient receptor potential cation channel, subfamily C, member 3                  | 3 B 3 18.2 cM       |

| <b>Symbol</b> | <b>Description</b>                                                                     | <b>Location</b>                     |
|---------------|----------------------------------------------------------------------------------------|-------------------------------------|
| Schip1        | schwannomin interacting protein 1                                                      | 3 E2                                |
| Schip1        | schwannomin interacting protein 1                                                      | 3 E2                                |
| Rhpn1         | rhopilin, Rho GTPase binding protein 1                                                 | 15 E1                               |
| Synpo2        | synaptopodin 2                                                                         | 3 G3                                |
| Podn          | podocan                                                                                | 4 C7                                |
| Lrrfip1       | leucine rich repeat (in FLII) interacting protein 1                                    | 1 D                                 |
| Pdpn          | podoplanin                                                                             | 4 E1                                |
| Mmp23         | matrix metalloproteinase 23                                                            | 4 E2                                |
| Sema3a        | sema domain, immunoglobulin domain (Ig), short basic domain, secreted, (semaphorin) 3A | 5 A1                                |
| Arrb1         | arrestin, beta 1                                                                       | 7 E2 7 50.0 cM                      |
| Ubc           | ubiquitin C                                                                            | 5 G1.1 5 64.0 cM                    |
| Sdk1          | sidekick homolog 1 (chicken)                                                           | 5 G2                                |
| Glcc1         | glucocorticoid induced transcript 1                                                    | 6 A1                                |
| Podxl         | podocalyxin-like                                                                       | 6 A3.3 6 10.0 cM                    |
| Col4a3        | collagen, type IV, alpha 3                                                             | 1 C5<br>19 C3 19 43.0 cM            |
| Pax2          | paired box gene 2                                                                      | cM                                  |
| Robo2         | roundabout homolog 2 (Drosophila)                                                      | 16 C3.1                             |
| Kirrel2       | kin of IRRE like 2 (Drosophila)                                                        | 7 B1                                |
| Nphs1         | nephrosis 1 homolog, nephrin (human)                                                   | ---                                 |
| Kirrel        | kin of IRRE like (Drosophila)                                                          | 3 F1                                |
| Ypel3         | yippee-like 3 (Drosophila)                                                             | 7 F3                                |
| Trib2         | tribbles homolog 2 (Drosophila)                                                        | 12 A1.1                             |
| Cited2        | Cbp/p300-interacting transactivator, with Glu/Asp-rich carboxy-terminal domain, 2      | 10 A2                               |
| Vegfc         | vascular endothelial growth factor C                                                   | 8 B3                                |
| Cdkn1c        | cyclin-dependent kinase inhibitor 1C (P57)                                             | 7 F5 7 69.49 cM                     |
| 2310066E14Rik | RIKEN cDNA 2310066E14 gene                                                             | 8 D3                                |
| Foxc2         | forkhead box C2                                                                        | 8 E1 8 65.5 cM                      |
| Cdkn1c        | cyclin-dependent kinase inhibitor 1C (P57)                                             | 7 F5 7 69.49 cM                     |
| Trpc6         | transient receptor potential cation channel, subfamily C, member 6                     | 9 A1 9 1.0 cM                       |
| Kirrel3       | kin of IRRE like 3 (Drosophila)                                                        | 9 A4                                |
| Actn4         | actinin alpha 4                                                                        | 7 A3                                |
| Efnb1         | ephrin B1                                                                              | X D X 37.0 cM                       |
| Nphs2         | nephrosis 2 homolog, podocin (human)                                                   | 1 G3                                |
| Plaur         | plasminogen activator, urokinase receptor                                              | 7 A3                                |
| Itga3         | integrin alpha 3                                                                       | 11 D 11 56.0 cM<br>11 E2 11 76.0 cM |
| Itgb4         | integrin beta 4                                                                        | cM                                  |
| Khdrbs3       | KH domain containing, RNA binding, signal transduction associated 3                    | 15 D3 15 37.5 cM                    |
| Fat1          | FAT tumor suppressor homolog 1 (Drosophila)                                            | 8 B1.1 8 25.0 cM                    |
| Plcb1         | phospholipase C, beta 1                                                                | 2 F3 2 76.7 cM                      |
| Plcg1         | phospholipase C, gamma 1                                                               | 2 H2 2 92.0 cM                      |



## **Additional GSEA methods**

We performed GSEA by comparing the arrays between mice with FVB/FVB or FVB/B6 genotypes across chromosome 8 (N=5 for each genotype). To detect empiric significance of enrichment results, we performed 10,000 permutation of gene labels in the arrays. As recommended, empiric p-values were corrected based on the Family-Wise Error rate (FWER), with FWER  $p < 0.05$  considered significant evidence of enrichment. To confirm enrichment for OXPHOS and PPAR signaling pathways, we re-analyzed the microarray data using three alternative MSD gene sets representing these pathways (MOOTHA\_VOXPHOS, PPARA\_PATHWAY, PPARG\_PATHWAY). To calculate correlation of expression of positional candidates with the oxidative phosphorylation and PPAR signaling pathways, we identified the leading edge subset for each pathway, as determined by GSEA (supplementary table 3). The expression of each component of the leading edge subset was standardized to a mean of 0 + 1 and a mean value was calculated for the OXPHOS and PPAR signaling pathways. We next calculated the Spearman correlation coefficient between each positional candidate and the mean expression for the OXPHOS and PPAR signaling pathways.
