# Supplementary material
Source: PubMed Central journal article supplement (PMC3998677)
Supplement: NIHMS569315-supplement-sup_table_3.pdf [file NIHMS569315-supplement-sup_table_3.pdf]

Supplementary table 2. Summary of sequence variants in the *Jund*, *Ocel1* and *Ndufa13* genes

| Gene                 | Variant   | Location                     | Rs#        | C57BL/6J* | FVB/NJ |
|----------------------|-----------|------------------------------|------------|-----------|--------|
| <b>JunD</b>          |           |                              |            |           |        |
| <b>(NM_010592)</b>   |           |                              |            |           |        |
|                      | -538A>G   | 5' near gene                 | rs33378487 | A         | G      |
|                      | -432G>A   | 5' near gene                 | rs52356704 | G         | A      |
|                      | c.390T>C  | Synonyms                     | Novel      | T         | C      |
| <b>OCEL1</b>         |           |                              |            |           |        |
| <b>(NM_029865)</b>   |           |                              |            |           |        |
|                      | -355C>G   | 5' near gene                 | Novel      | C         | G      |
|                      | -345G>A   | 5' near gene                 | Novel      | G         | A      |
|                      | -260C>A   | 5'-UTR                       | Novel      | C         | A      |
|                      | -227T>C   | 5'-UTR                       | Novel      | T         | C      |
|                      | -202A>G   | 5'-UTR                       | Novel      | A         | G      |
|                      | -118C>T   | 5'-UTR                       | Novel      | C         | T      |
|                      | c.200G>A  | Coding Missense<br>(R67K)    | rs33439200 | G         | A      |
|                      | c.530G>T  | Coding Missense<br>(G177V)   | rs16822110 | G         | T      |
|                      | *20C>T    | 3'-UTR                       | Novel      | C         | T      |
|                      | *64G>A    | 3'-UTR                       | Novel      | G         | A      |
| <b>Ndufa13</b>       |           |                              |            |           |        |
| <b>(NM_023312.2)</b> |           |                              |            |           |        |
|                      | -101T>A   | 5' near gene                 | rs33123031 | T         | A      |
|                      | 95-35A>G  | Intron                       | Novel      | A         | G      |
|                      | 245+77A>G | Intron                       | Novel      | A         | G      |
|                      | c.336T>C  | Coding Synonymous<br>(H112H) | rs47057495 | T         | C      |
|                      | 435+48G>A | 3'-UTR                       | rs48102395 | G         | A      |

The reference sequence for each gene is indicated below the name of each gene
